# Supplementary material
Source: PubMed Central journal article supplement (PMC2996119)

**Figure S1. Correlative analysis of TGF- $\beta$ 1 levels and frequency of CD4<sup>+</sup>Foxp3<sup>+</sup> cells**  
The frequency of total Foxp3<sup>+</sup> cells within the CD4<sup>+</sup> population in the patient cohort correlated positively with plasma levels of TGF- $\beta$ 1 ( $r=0.6$ ,  $p=0.02$ ).

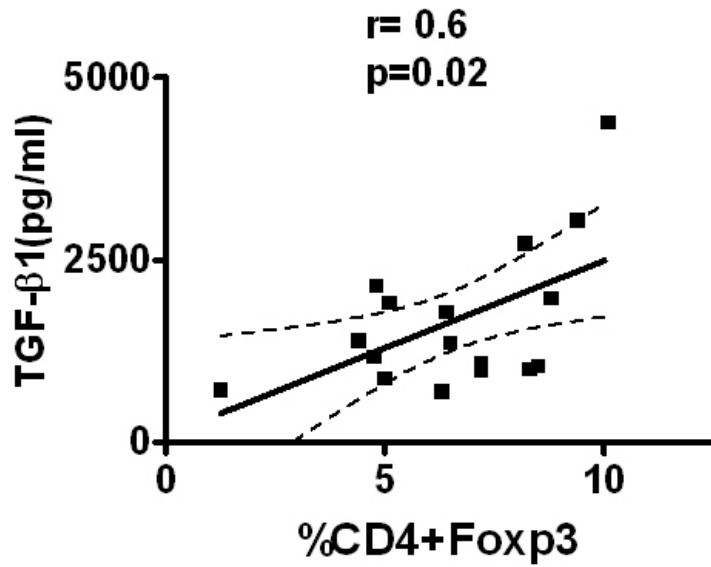

**Figure S2**

Proliferation (in cpm) of sorted CD4<sup>+</sup>CD25<sup>hi</sup> Treg cells and effector CD4<sup>+</sup>CD25<sup>-</sup> T cells alone or in combination at different ratios in the presence of plate-bound 0.1 μg/ml anti-CD3 antibodies and allogeneic accessory cells in patients before treatment (black bars, n=10) and in patient on treatment with thrombopoietic agents (white bars, n=9).

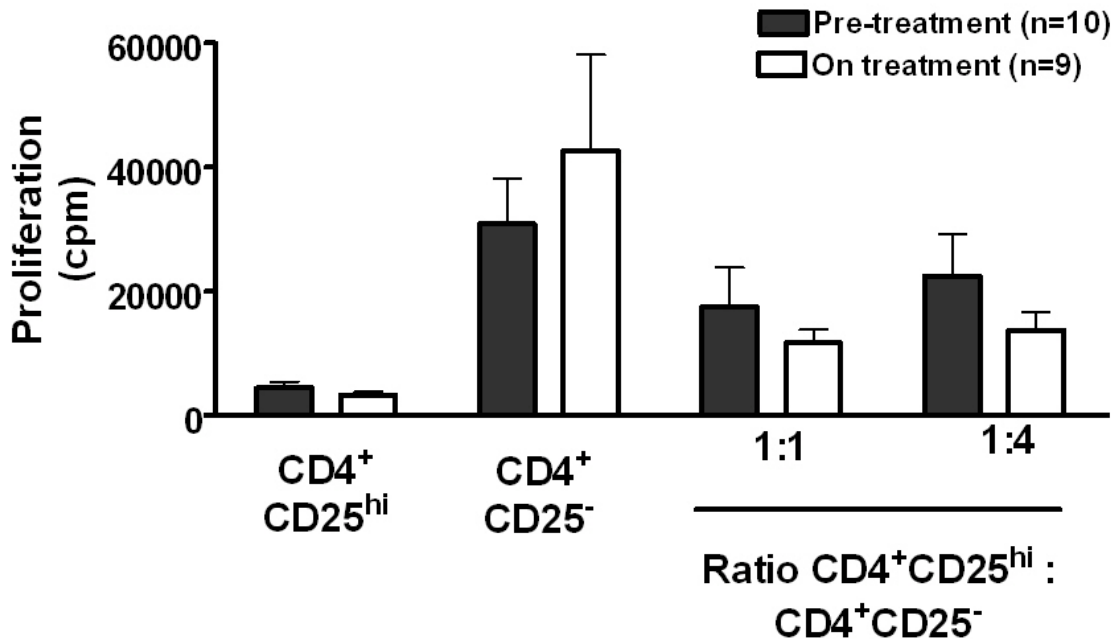

Supplement: blood-2010-04-281717_1.pdf [file blood-2010-04-281717_1.pdf]
